# Supplementary material for: Efficient and accurate determination of genome-wide DNA methylation patterns in Arabidopsis thaliana with enzymatic methyl sequencing
Source: PubMed Central journal article supplement (PMC7542392; doi:10.1186/s13072-020-00361-9), 2020-10-07
Supplement: 13072_2020_361_MOESM1_ESM.pdf [file 13072_2020_361_MOESM1_ESM.pdf]

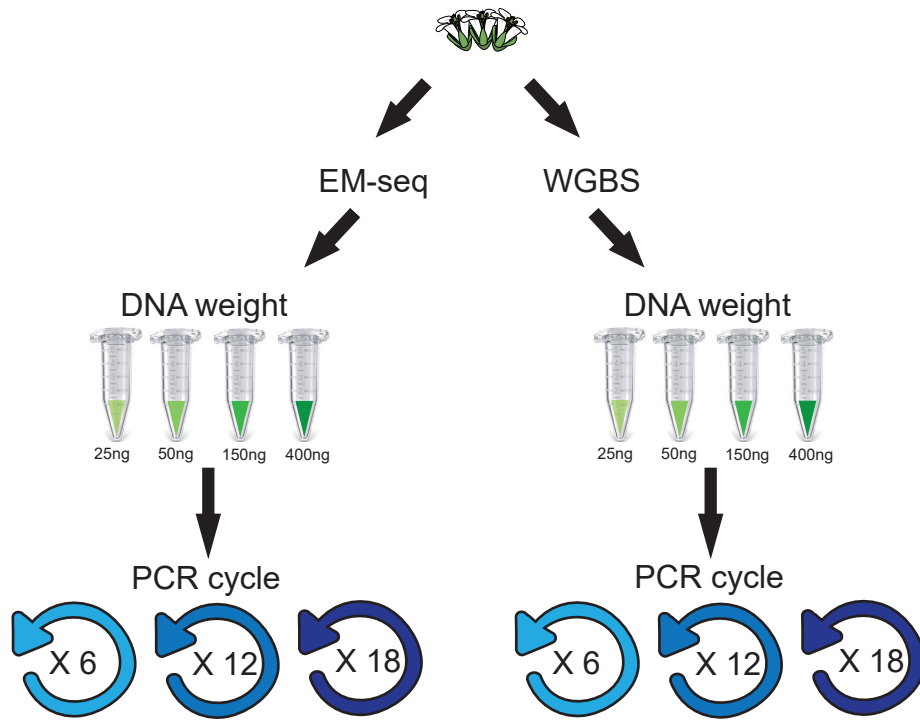

**Figure S1** Schematic diagram of experimental design.

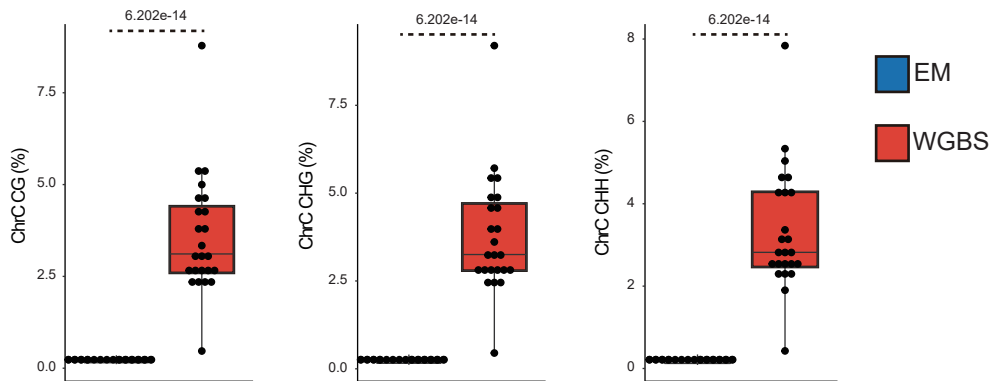

**Figure S2** CG, CHG, and CHH methylation levels detected in chloroplast genome by EM-seq and WGBS. Blue box represents EM-seq and red box represents WGBS. The P values, shown at the top of the plots, were estimated with a Student's t-test.

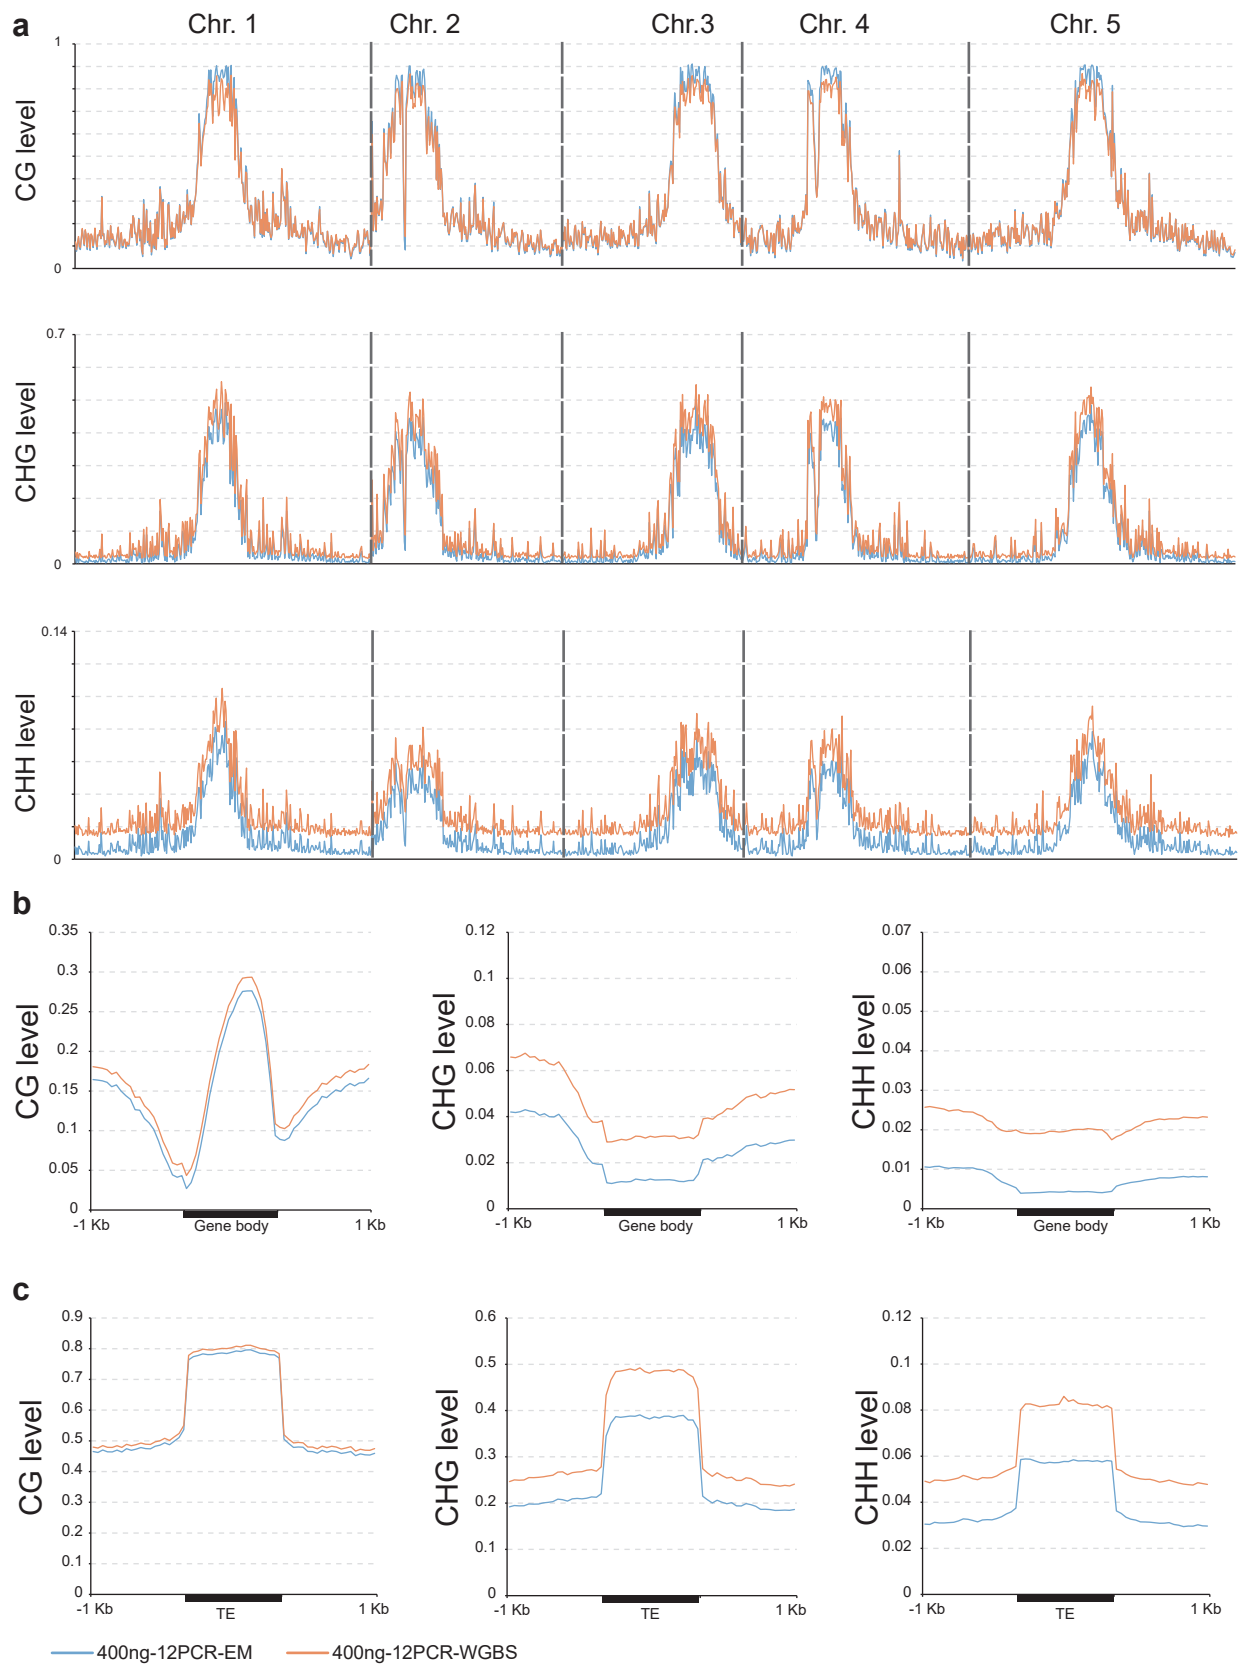

**Figure S3** Comparison of methylation pattern between EM-seq and WGBS libraries prepared with 400ng DNA input and 12 cycles of PCR. **a** Chromosomal distribution of CG, CHG, and CHH methylations. Methylation levels were calculated with Arabidopsis chromosomes divided into 100 Kb bins. **b** Metaplots of CG, CHG, and CHH methylations over genes and 1 Kb flanking sequences. **c** Metaplots of CG, CHG, and CHH methylation over TEs and 1 Kb flanking sequences.

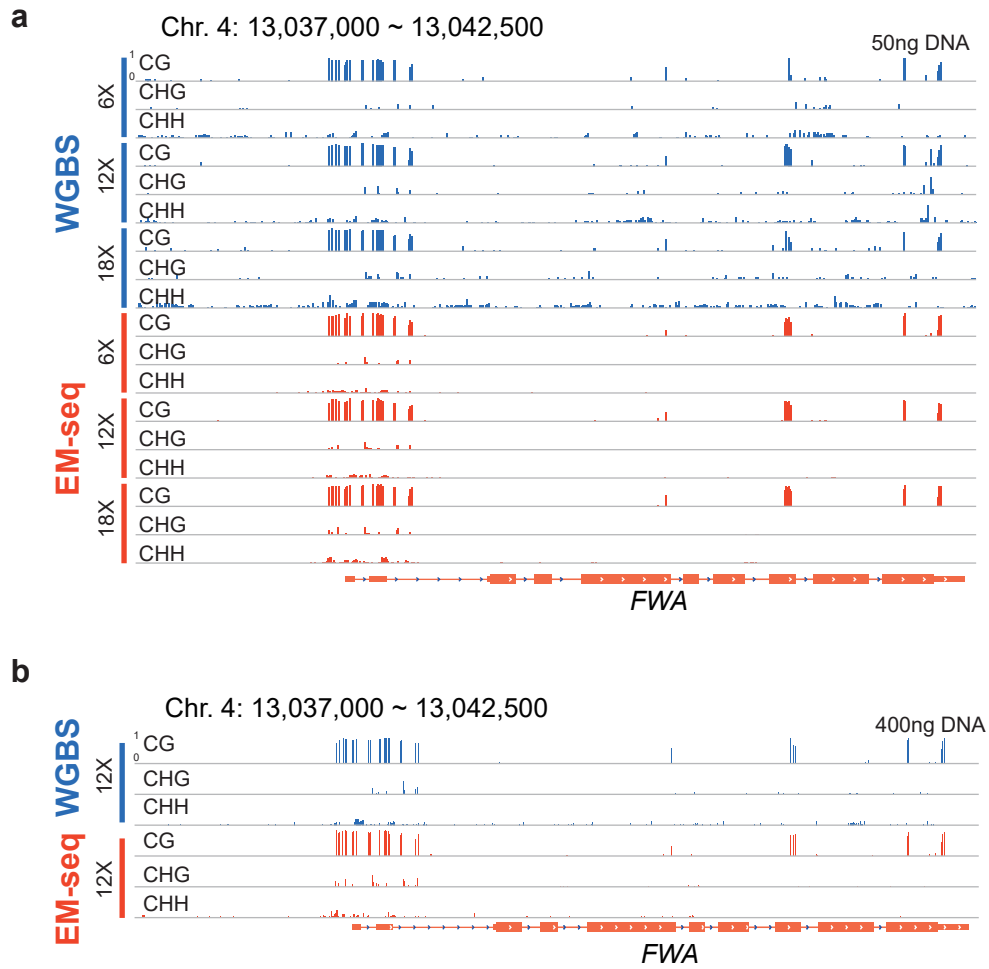

**Figure S4** Genome browser screenshots of *FWA* locus. **a** Comparison of methylation detected by EM-Seq and WGBS in libraries prepared with 50ng DNA input. **b** Comparison of methylation detected by EM-Seq and WGBS in libraries prepared with 400ng DNA input and 12 cycles of PCR.

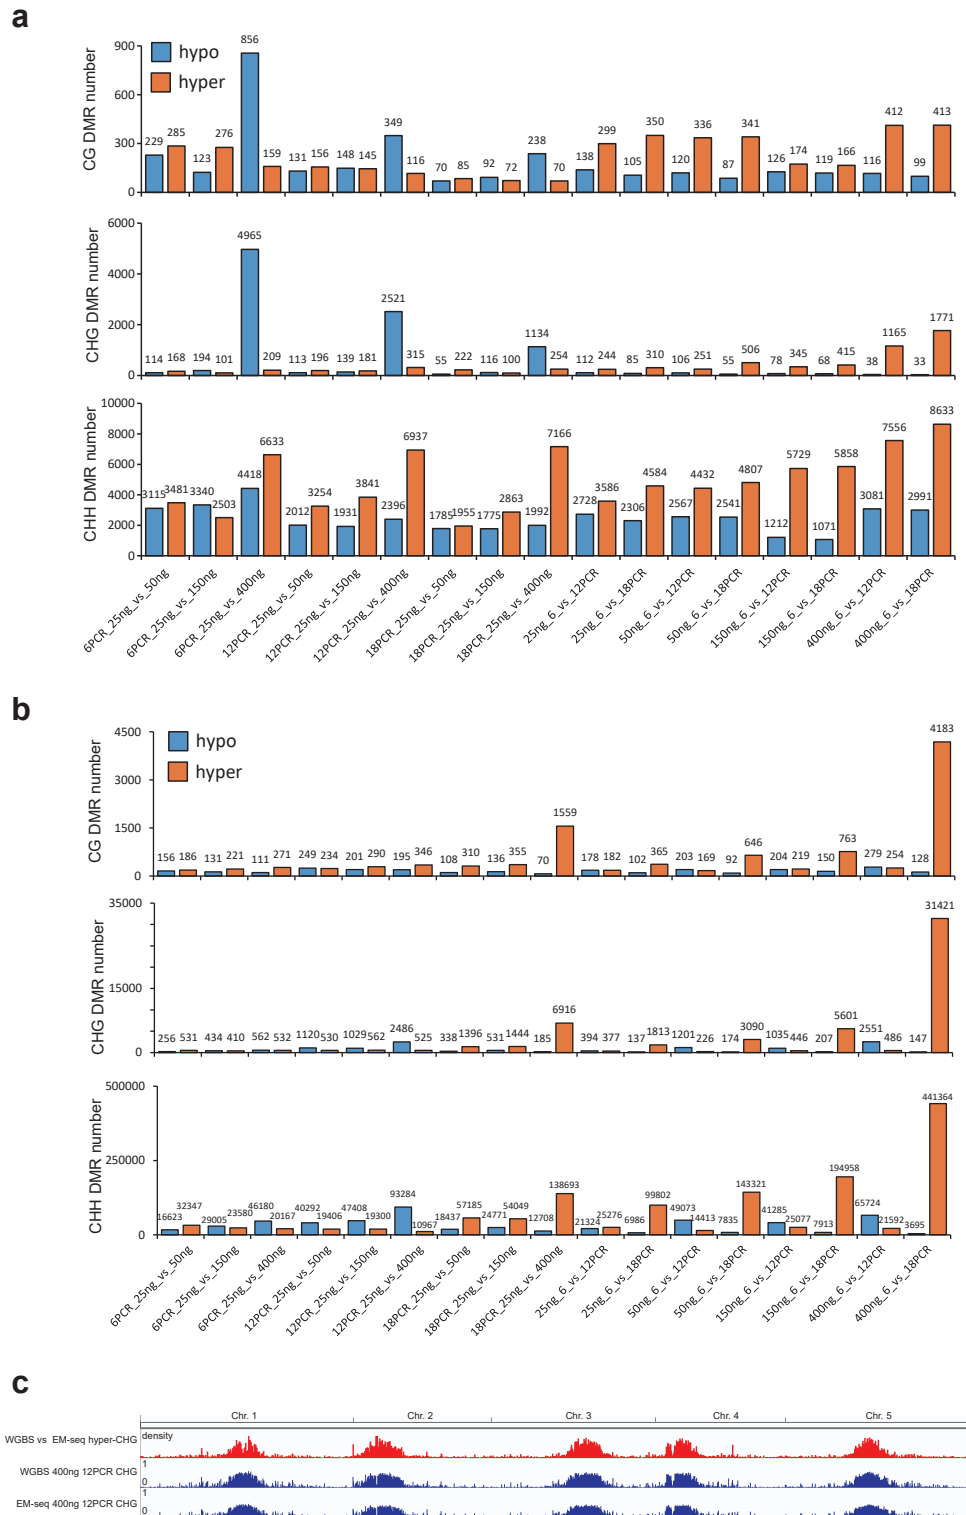

**Figure S5** DMR numbers and chromosomal distribution. **a** DMR numbers between EM-seq libraries prepared with different conditions. **b** DMR numbers between WGBS libraries prepared with different conditions. **c** Chromosomal distribution of CHG methylation in EM-seq and WGBS libraries prepared with 400ng DNA input and 12 cycles of PCR and WGBS hyper-CHG DMRs.

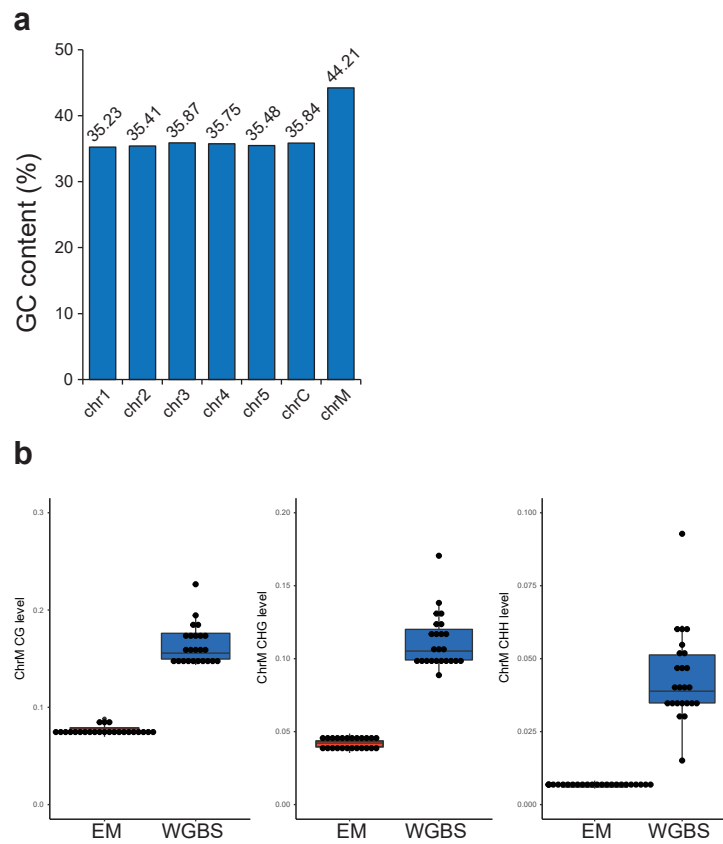

**Figure S6** Methylation in mitochondrial DNA. **a** GC contents of Arabidopsis chromosomes. **b** CG, CHG, and CHH methylation levels in mitochondrial DNA.

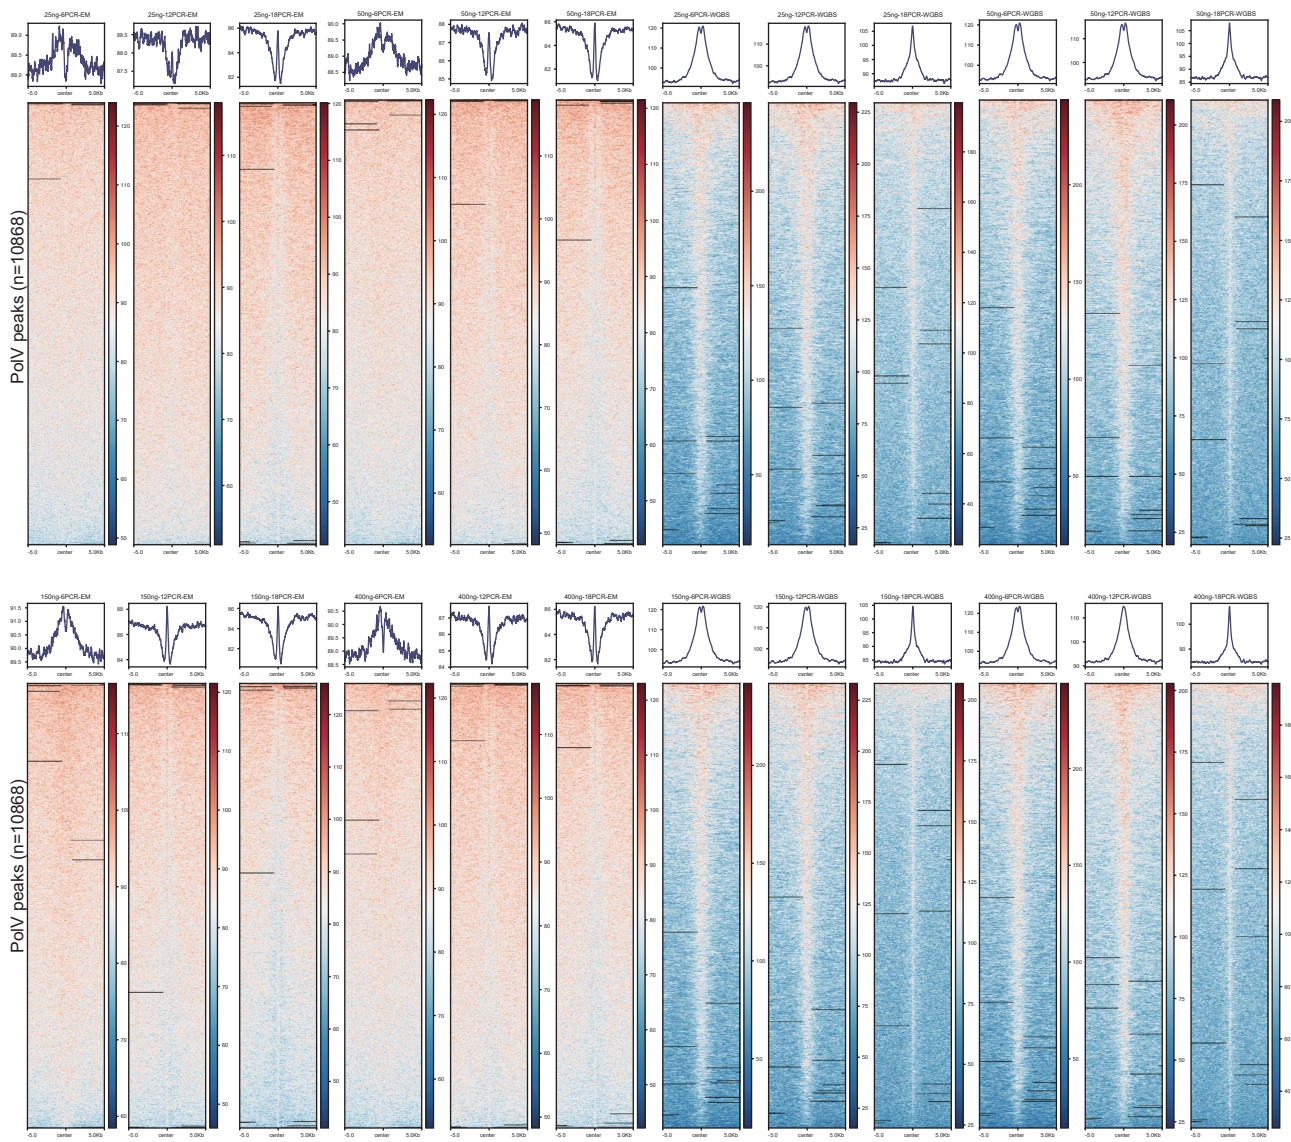

**Figure S7** Heatmaps showing read coverage of EM-seq (left six columns both rows) and WGBS (right six columns both rows) over PoIV ChIP-seq peaks.



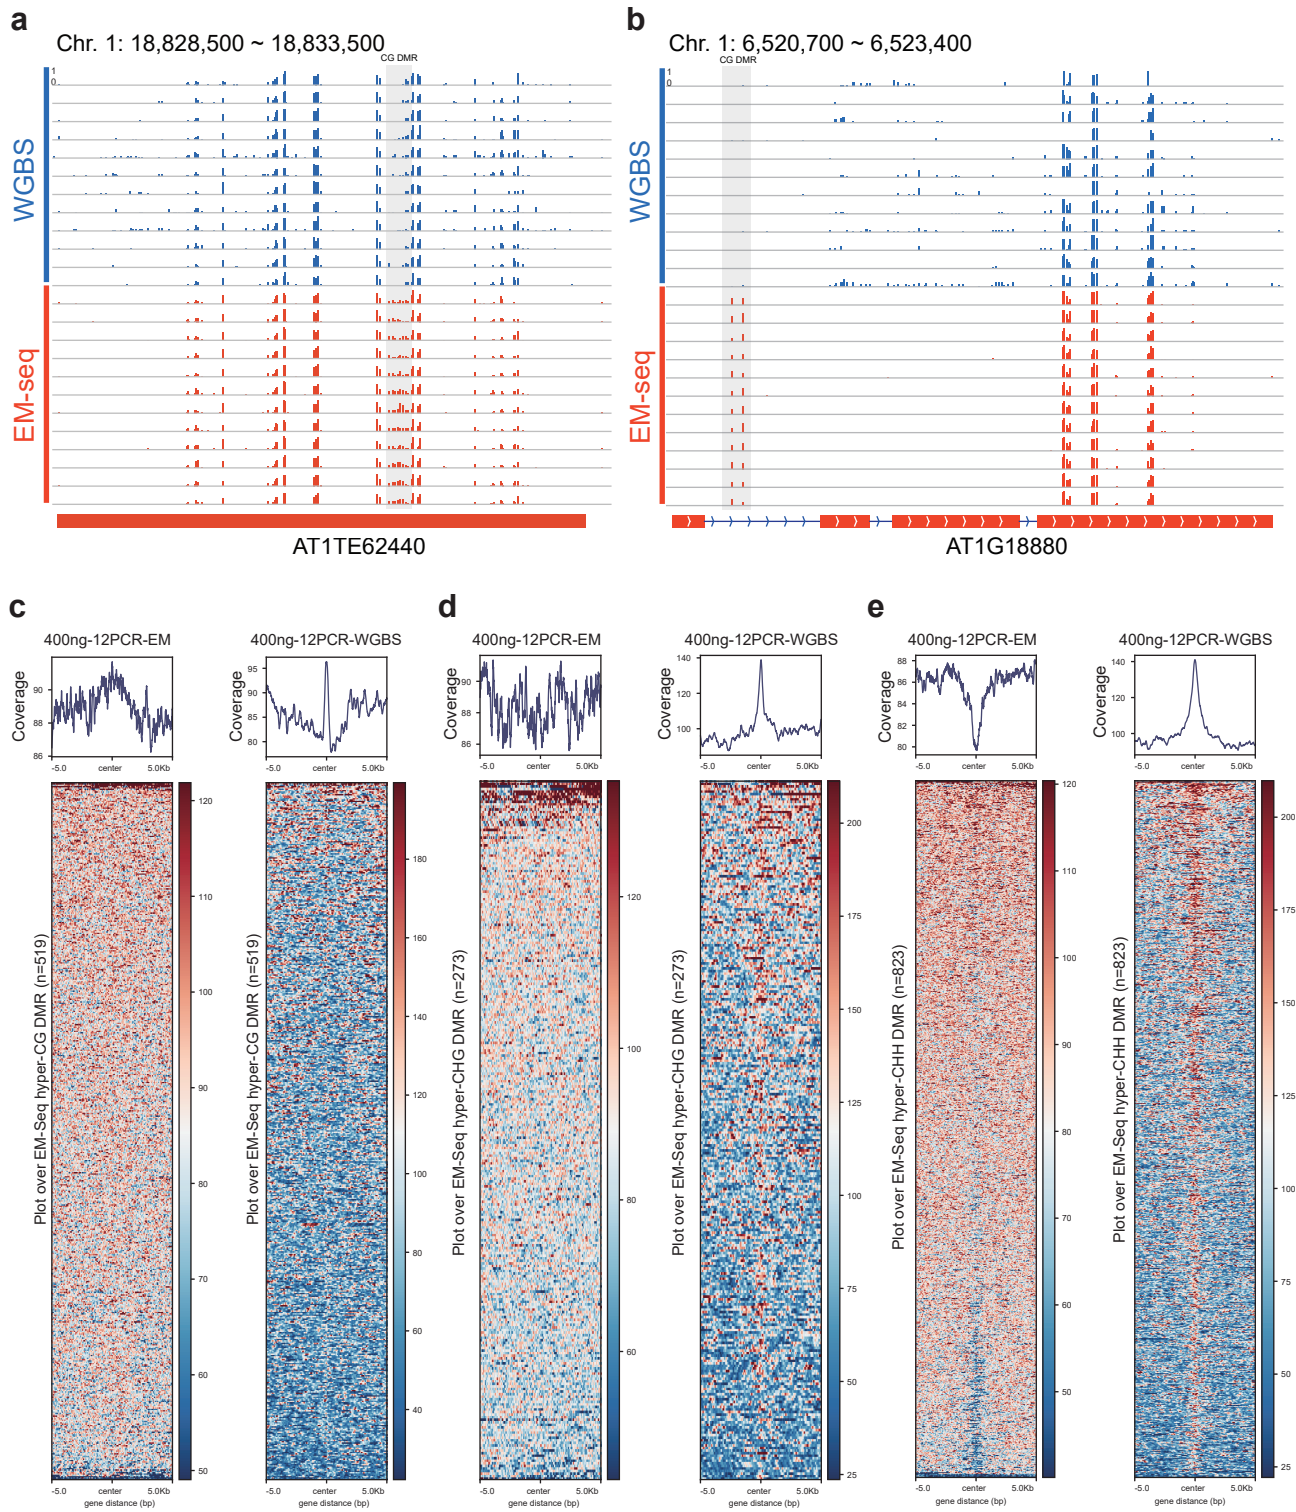

**Figure S8** EM-seq hyper-DMRs. **a,b** Genome browser screenshots of EM-seq hyper-DMRs in pericentromeric TE (**a**) and in gene (**b**). **c-e** Heatmaps showing read coverage of EM-seq (left panels) and WGBS (right panels) over EM-seq hyper-CG (**c**), CHG (**d**), and CHH (**e**) DMRs.



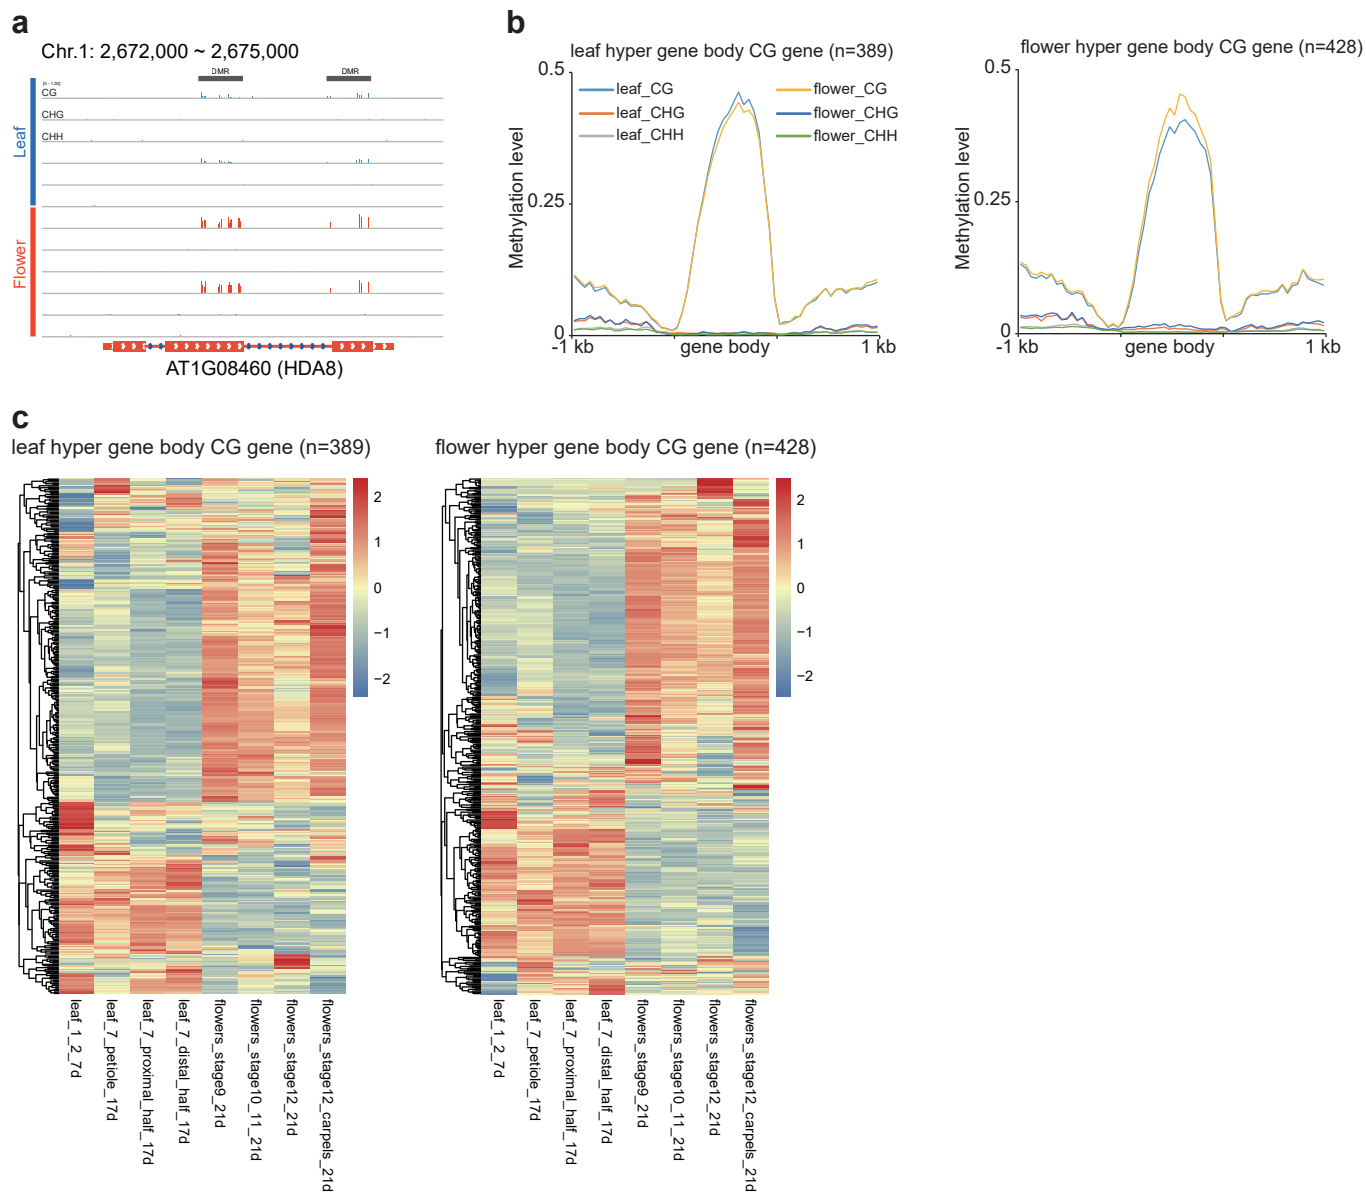

**Figure S9** Gene body methylated genes. **a** Genome browser screenshots of flower hyper-CG DMRs in a gene body methylated gene. **b** Metaplots of CG, CHG, and CHH methylations in leaf and flower samples over genes containing hyper-CG DMRs and 1 Kb flanking sequences. **c** Clustering of expression patterns of gene body methylated genes containing hyper-CG DMRs.
